# Supplementary material for: Imaging and AI based chromatin biomarkers for diagnosis and therapy evaluation from liquid biopsies
Source: PubMed Central journal article supplement (PMC10719365; doi:10.1038/s41698-023-00484-8), 2023-12-14
Supplement: 41698_2023_484_MOESM1_ESM.pdf [file 41698_2023_484_MOESM1_ESM.pdf]

*Supplemental Information for*  
**Imaging and AI based Chromatin Biomarkers for Diagnosis  
and Therapy Evaluation from Liquid Biopsies**

Kiran Challa<sup>1,#</sup>, Daniel Paysan<sup>1,2,#</sup>, Dominic Leiser<sup>3</sup>, Nadia Sauder<sup>3</sup>, Damien C. Weber<sup>3,4,5,\*</sup>, GV Shivashankar<sup>1,2,\*</sup>

<sup>1</sup> *Mechano-Genomic Group, Division of Biology and Chemistry, Paul-Scherrer Institute, Villigen, Switzerland*

<sup>2</sup> *Department of Health Sciences and Technology, ETH Zurich, Zurich, Switzerland*

<sup>3</sup> *Center for Proton Therapy, Paul-Scherrer Institute, Villigen Switzerland*

<sup>4</sup> *Department of Radio-Oncology, University Hospital Zurich, Zurich, Switzerland*

<sup>5</sup> *Department of Radio-Oncology, University of Bern, Bern, Switzerland*

# Equal contribution

\* To whom correspondence should be addressed: g.v.shivashankar@hest.ethz.ch

---

This PDF file includes:

- Supplementary Figure 1- 5
- Supplementary Table 1-4

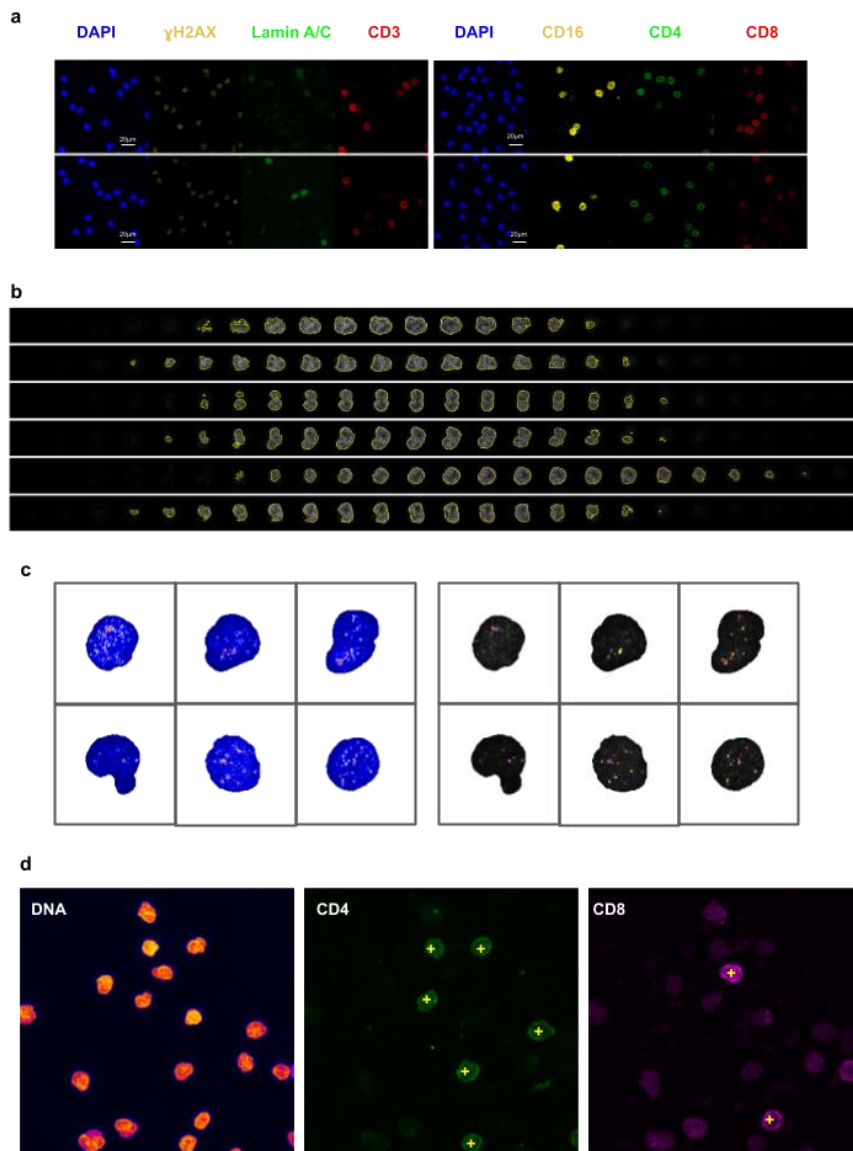

### Supplementary Figure 1: Visualization of the computational platform.

- Overview of representative fluorescently-labeled images (2 images from each staining group) input to our computational pipeline. Maximum z-projections are shown. Scale bar represents 20 $\mu$ m.
- Visualization of the 3D nuclei segmentation results for 6 randomly chosen nuclei. Each row shows an individual nucleus and each column corresponds to a specific layer of the 3D z-stack image. The segmentation is shown as the yellow outline for each layer.
- Visualization of the gH2AX foci detection results for six representative nuclei. The detection of gH2AX foci is performed using the maximum-projected single-nuclei images which are shown for 6 randomly chosen nuclei on the right, here warmer colors correspond to higher gH2AX intensity. The left plot shows identified foci and highlights those in color while plotting them against a background that shows the intensity of the single-nuclei image corresponding to the gH2AX channel. Images were range-normalized for better visibility.
- Visualization of the cell type classification results by showing the max-z projection of a randomly chosen field of view image with the immunofluorescent labels for the DNA, CD4 and CD8 (left to right). Cells labeled positively for CD4 or CD8 by our cell type classification pipeline (see Methods) are marked in the respective images with a yellow plus sign.

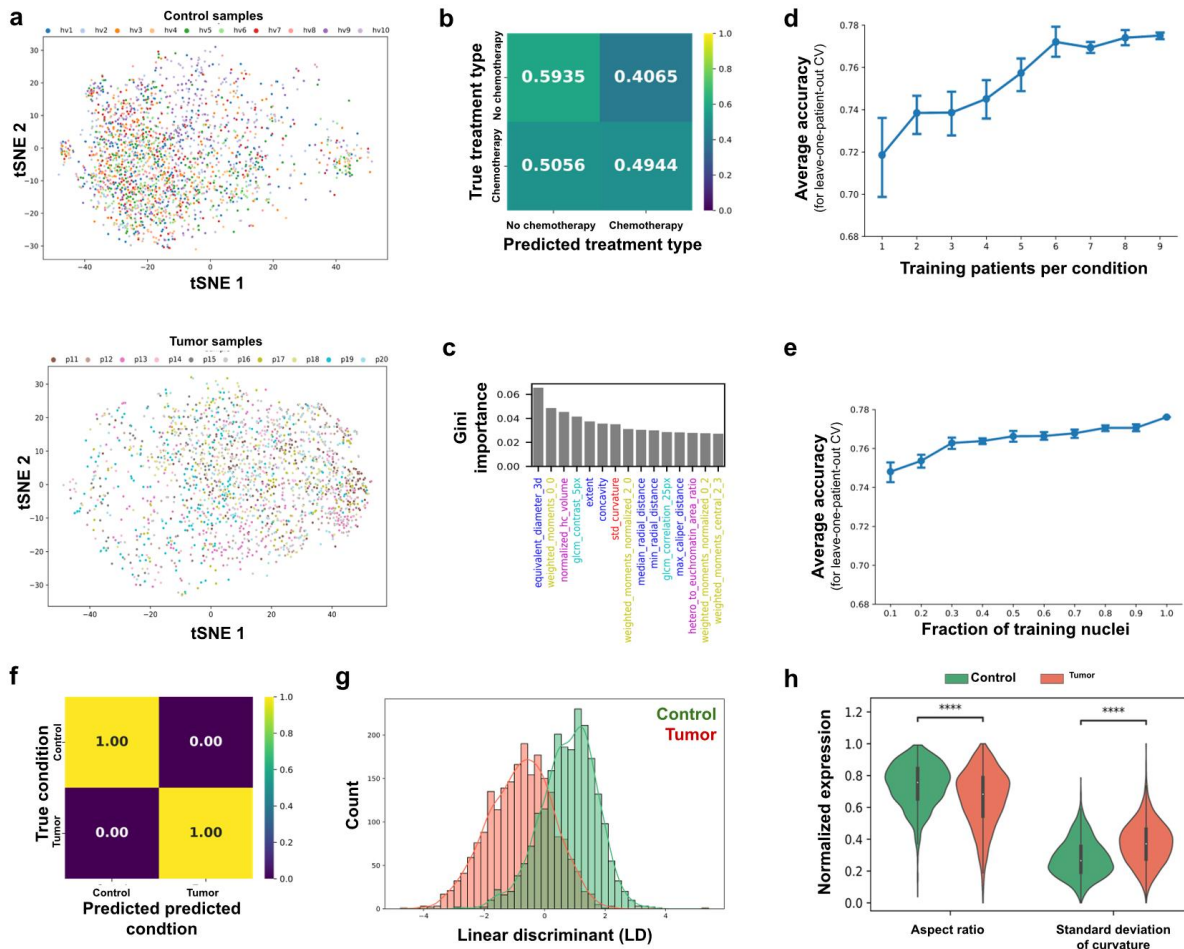

**Supplementary Figure 2: Extended analyses of the chromatin phenotypes of PBMCs from the control and the pan-tumor population.**

- Visualization of the inter- and intra-patient variation of the chrometric profiles of the PBMCs in the control (left) and the pan-tumor (right) population using a tSNE plot. PBMCs represented by individual points are colored according to the biological sample they correspond to, i.e. the patient or control sample represented by its unique identifier.
- Confusion matrix showing the performance of a RFC used to distinguish between patients with and without chemotherapy in the pan-tumor population. The performance of the RFC is evaluated using 5-fold stratified patient-level cross-validation and the row-normalized, average confusion matrix is plotted.
- Barplot showing the importance of the chrometric features used by RFC to distinguish between tumor patients with/without preceding chemotherapy. The color-coding is done in alignment with Fig. 2 and the top 15 features are shown.
- Visualization of the average leave-one-patient-out cross-validation accuracy of the random forest classifier (RFC) distinguishing between PBMCs from healthy control and pantumor patients when it is trained on only one, two up to 9 randomly sampled patients per condition.
- Visualization of the average leave-one-patient-out cross-validation accuracy of the RFC distinguishing between PBMCs from healthy control and pantumor patients when it is trained on only 10%, 20% up to 100% randomly sampled nuclei per patient.
- Patient-level average of the row-normalized confusion matrices for a RFC evaluated in a leave-one-patient-out cross-validation scheme on the task of classifying the respective condition (i.e. tumor or control label). Predictions on a patient-level by selecting the most frequent prediction label of the RFC applied to the PBMCs of the respective patient.
- Linear discriminant plot of the control (green) and the pan-tumor PBMC population (red). The LDA achieves an accuracy of 0.7463 (+/- 0.1225) in a leave-one-patient-out cross-validation scheme.
- Violin plot showing the range-normalized expression of the two additional chrometric features that are differentially expressed in the PBMC populations of the control (green) and pan-tumor population (red). P-values <  $10^{-62}$ , two-sided Welch's t-tests.

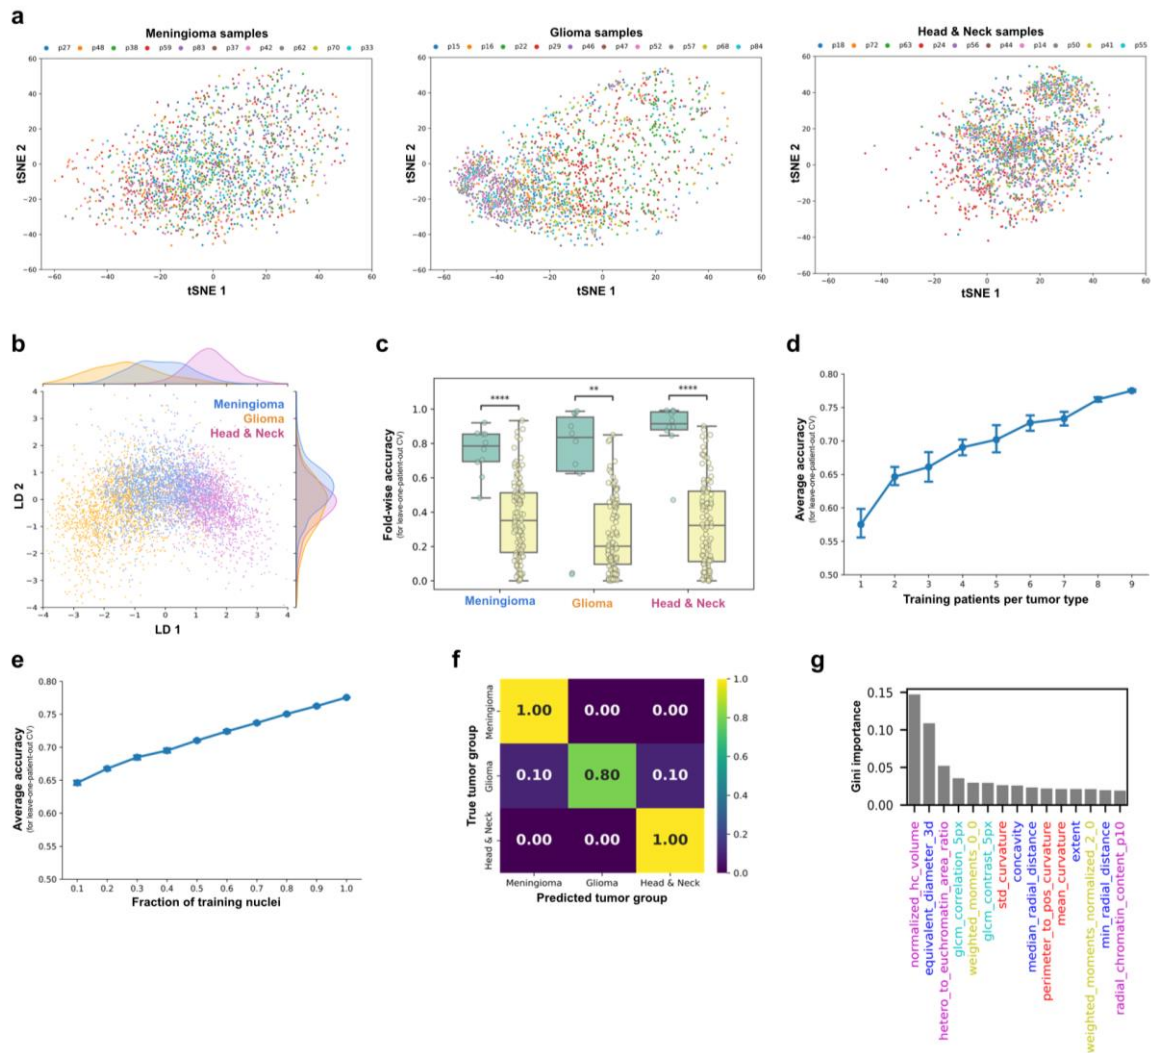

### Supplementary Figure 3: Extended analyses of the chromatin phenotypes of PBMCs from three tumor group populations.

- Visualization of the chrometric profiles of the PBMCs (n=7,200) of the Meningioma (top), Glioma (center) and Head & Neck tumor population (bottom) using a tSNE plot. Each point represents a single PBMC which is colored according to the patient sample it originates from.
- Linear discriminant plot of the PBMCs of the Meningioma (blue), Glioma (orange) and Head & Neck tumor group population (pink). The LDA achieves an accuracy of 0.6556 (+/- 0.2783) in a leave-one-patient-out cross-validation scheme on classifying PBMCs with respect to their respective tumor group given the corresponding chrometric profiles.
- Boxplot showing the performance of a RandomForest classifier (light green) against a random baseline (light yellow) for identifying PBMCs of the three selected tumor group populations using their respective chrometric profiles. The performance is evaluated using leave-one-patient-out cross-validation and the random baseline is obtained by permuting (10 times) the condition labels of the PBMCs (see Methods). P-values are coded as defined in Fig. 3E, two-sided Wilcoxon rank-sum-Wilcoxon test.
- Visualization of the average leave-one-patient-out cross-validation accuracy of the random forest classifier (RFC) distinguishing between PBMCs from the three tumor group populations patients when it is trained on only one, two up to 9 randomly sampled patients per condition.
- Visualization of the average leave-one-patient-out cross-validation accuracy of the RFC distinguishing between PBMCs from the three tumor group populations when it is trained on only 10%, 20% up to 100% randomly sampled nuclei per patient.
- Patient-level average of the row-normalized confusion matrices for a RFC evaluated in a leave-one-patient-out cross-validation scheme on the task of classifying the respective condition (i.e. the tumor group label). Predictions on a patient-level were obtained by selecting the most frequent prediction label of the RFC applied to the PBMCs of the respective patient.
- Barplot showing the importance of the chrometric features used by RFC to distinguish between the different tumor groups given the chrometric profiles of the PBMCs. The color-coding is done in alignment with Fig. 2 and the top 15 features are shown.

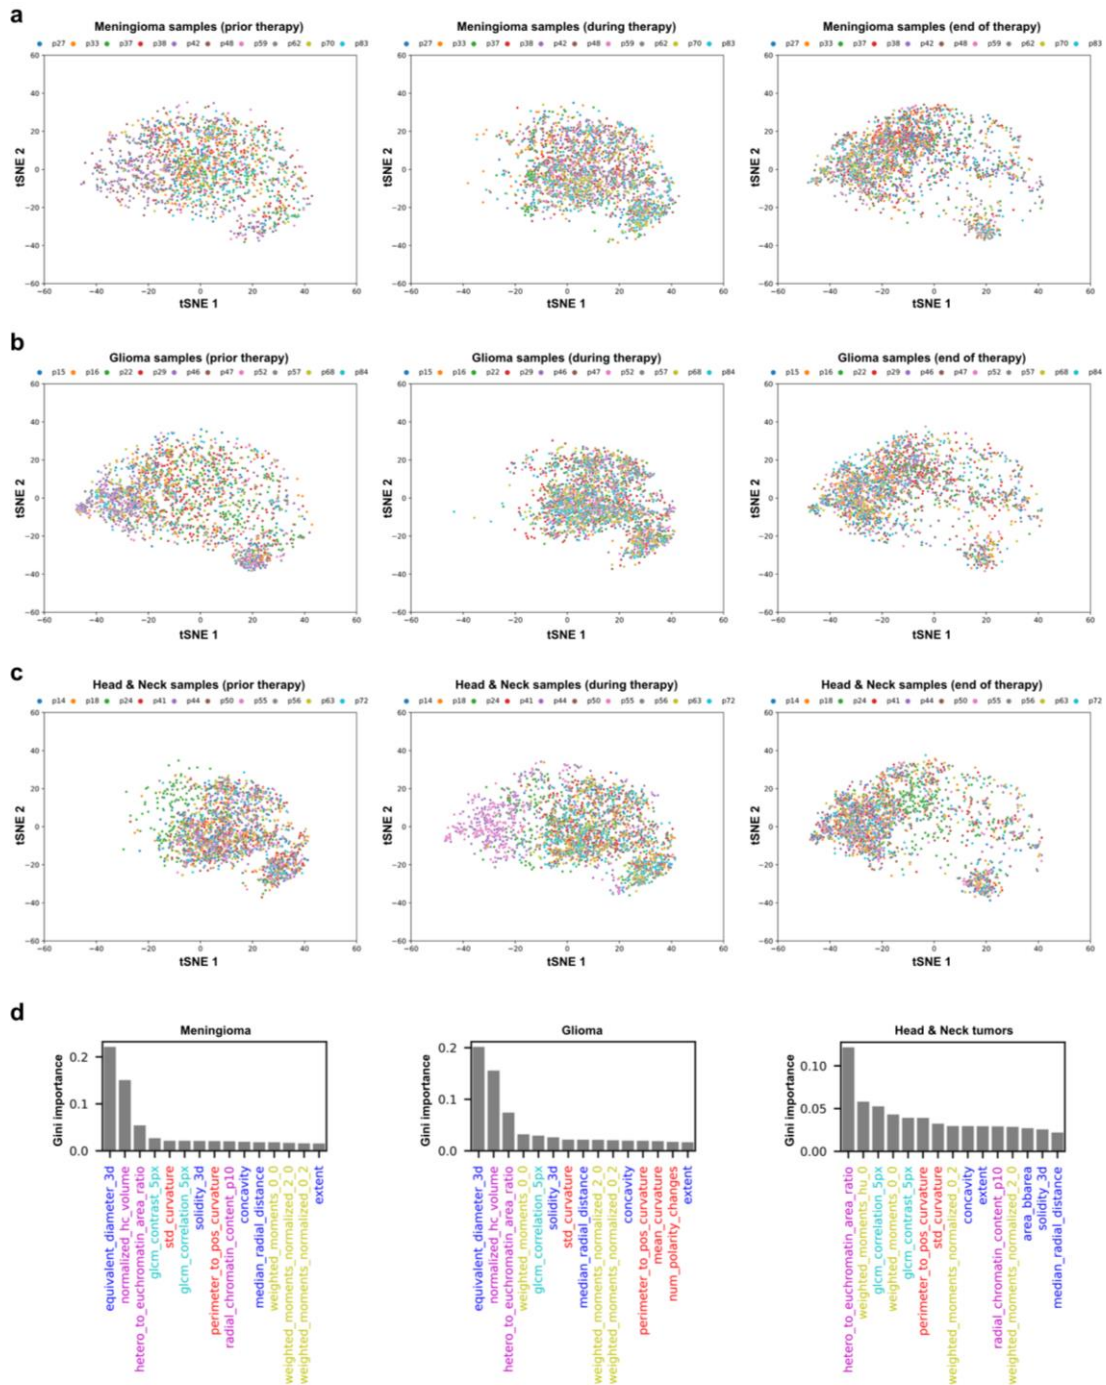

**Supplementary Figure 4: Extended analyses of the chromatin organization of PBMCs over the course of proton therapy treatment.**

- Visualization of the chrometric profiles of the PBMCs ( $n=7,200$  each) of the Meningioma population prior to, during and at the end of proton therapy (left to right) using a tSNE plot. Each point represents a single PBMC which is colored according to the patient sample it originates from.
- Visualization of the chrometric profiles of the PBMCs ( $n=7,200$  each) of the Glioma population prior to, during and at the end of proton therapy (left to right) using a tSNE plot. Each point represents a single PBMC which is colored according to the patient sample it originates from.
- Visualization of the chrometric profiles of the PBMCs ( $n=7,200$  each) of the Head & Neck tumor population prior to, during and at the end of proton therapy (left to right) using a tSNE plot. Each point represents a single PBMC which is colored according to the patient sample it originates from.
- Barplot showing the importance of the chrometric features used by RFC to distinguish between the different treatment time points for the Meningioma (left), Glioma (center) and Head and neck tumor populations given the chrometric profiles of the PBMCs. The color-coding is in accordance with Fig. 2 and the top 15 features are shown.

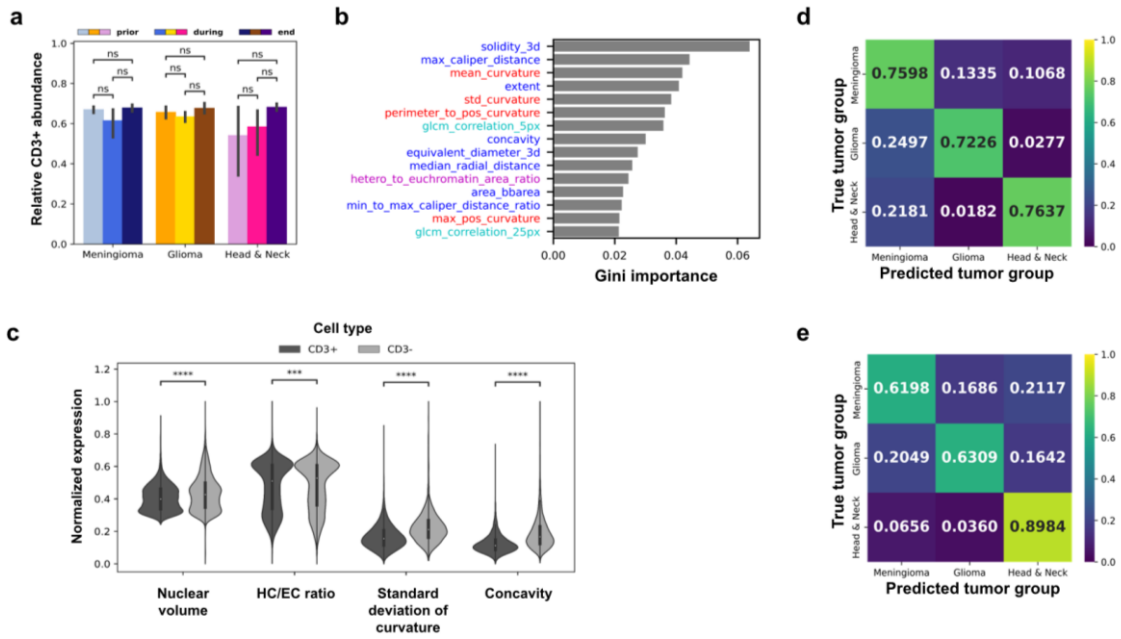

**Supplementary Figure 5: Extended analyses of the cell type-specific effects of proton therapy on PBMCs.**

- Bar plot showing the average, relative abundance of CD3+ T-cells across the different patient-specific PBMC populations across the different tumor groups and treatment time points. Error bars reflect one standard deviation. P-values: Welch's t-test.
- Barplot showing the importance of the chrometric features used by RFC to distinguish between CD3+ and CD3- PBMCs based on their chrometric profiles. The color-coding is in accordance with Fig. 2 and the top 15 features are shown.
- Violin plot showing the range-normalized expression of the three most differentially expressed chrometric features between the CD3+ (dark gray) and the CD3- (light gray) PBMCs. P-values are coded as defined in Fig. 3E, two-sided Welch's t-tests.
- Average of the row-normalized confusion matrices for a RFC evaluated in a leave-one-patient-out cross-validation scheme on the task of classifying the respective tumor group label of PBMC given their chrometric profiles using only CD3+ PBMCs (i.e. T cells) (see Methods). Two head and neck patients with less than two CD3+ T cells were excluded prior to the analyses. The classifier achieves an average accuracy of 0.7406 (+/- 0.2372).
- Average of the row-normalized confusion matrices for a RFC evaluated in a leave-one-patient-out cross-validation scheme on the task of classifying the respective tumor group label of PBMC given their chrometric profiles using only CD3- PBMCs (i.e. non-T cells) (see Methods). Two head and neck patients with less than two CD3+ T cells were excluded prior to the analyses. The classifier achieves an average accuracy of 0.7284 (+/- 0.2350).

**Supplementary Table 1: Overview of the study population forming the control and pan-tumor population.**

Ages are given in years. Sex is abbreviated as (M) for male and (F) for female. The preceding chemotherapy column indicates if the patient has undergone chemotherapy prior to the study enrollment.

| Patient ID | Age | Sex | Diagnosis                  | Condition | Preceding chemotherapy |
|------------|-----|-----|----------------------------|-----------|------------------------|
| HV01       | 24  | M   | healthy                    | control   | n/a                    |
| HV02       | 33  | M   | healthy                    | control   | n/a                    |
| HV03       | 42  | F   | healthy                    | control   | n/a                    |
| HV04       | 60  | M   | healthy                    | control   | n/a                    |
| HV05       | 26  | M   | healthy                    | control   | n/a                    |
| HV06       | 60  | M   | healthy                    | control   | n/a                    |
| HV07       | 32  | M   | healthy                    | control   | n/a                    |
| HV08       | 28  | F   | healthy                    | control   | n/a                    |
| HV09       | 45  | F   | healthy                    | control   | n/a                    |
| HV10       | 35  | M   | healthy                    | control   | n/a                    |
| P11        | 5   | F   | Embryonal Rhabdomyosarcoma | tumor     | yes                    |
| P12        | 53  | F   | Neuroblastoma              | tumor     | no                     |
| P13        | 10  | M   | Hodgkin's lymphoma         | tumor     | yes                    |
| P14        | 17  | M   | Squamous cell carcinoma    | tumor     | yes                    |
| P15        | 37  | F   | Astrocytoma                | tumor     | no                     |
| P16        | 17  | M   | Glioblastoma               | tumor     | no                     |
| P17        | 21  | F   | Hodgkin's lymphoma         | tumor     | yes                    |
| P18        | 41  | M   | Adenoid cystic carcinoma   | tumor     | no                     |
| P19        | 7   | F   | Medulloblastoma            | tumor     | no                     |
| P20        | 29  | M   | Hemangiopericytoma         | tumor     | no                     |

**Supplementary Table 2: Overview of the study population corresponding to the Meningioma patients.**

Ages are given in years. Sex is abbreviated as (M) for male and (F) for female. Chemotherapy indicates if the patient has undergone chemotherapy prior to the study enrollment. The chemotherapy column indicates if patients underwent proton therapy prior, during and/or after proton therapy.

| Patient ID | Age | Sex | Diagnosis  | Chemotherapy |
|------------|-----|-----|------------|--------------|
| P27        | 61  | F   | Meningioma | none         |
| P33        | 57  | M   | Meningioma | none         |
| P37        | 28  | M   | Meningioma | none         |
| P38        | 50  | M   | Meningioma | none         |
| P42        | 67  | F   | Meningioma | none         |
| P48        | 46  | F   | Meningioma | none         |
| P59        | 43  | F   | Meningioma | none         |
| P62        | 58  | F   | Meningioma | none         |
| P70        | 51  | F   | Meningioma | none         |
| P83        | 16  | M   | Meningioma | none         |



**Supplementary Table 3: Overview of the study population corresponding to the Glioma patients.**

Ages are given in years. Sex is abbreviated as (M) for male and (F) for female. Chemotherapy indicates if the patient has undergone chemotherapy prior to the study enrollment. The chemotherapy column indicates if patients underwent proton therapy prior, during and/or after proton therapy.

| Patient ID | Age | Sex | Diagnosis                | Chemotherapy          |
|------------|-----|-----|--------------------------|-----------------------|
| P15        | 37  | F   | Astrocytoma              | none                  |
| P16        | 17  | M   | Glioblastoma             | during, after         |
| P22        | 38  | M   | Astrocytoma              | before                |
| P29        | 46  | M   | Pilocytic<br>Astrocytoma | none                  |
| P46        | 42  | F   | Oligodendroglioma        | none                  |
| P47        | 38  | F   | Astrocytome              | none                  |
| P52        | 19  | F   | Glioblastoma             | none                  |
| P57        | 41  | M   | Astrocytoma              | before, during, after |
| P68        | 25  | M   | Oligodendroglioma        | after                 |
| P84        | 27  | F   | Oligodendroglioma        | none                  |

**Supplementary Table 4: Overview of the study population corresponding to the head and neck tumor patients.**

Ages are given in years. Sex is abbreviated as (M) for male and (F) for female. Chemotherapy indicates if the patient has undergone chemotherapy prior to the study enrollment. The chemotherapy column indicates if patients underwent proton therapy prior, during and/or after proton therapy.

| Patient ID | Age | Sex | Diagnosis                              | Chemotherapy   |
|------------|-----|-----|----------------------------------------|----------------|
| P14        | 17  | M   | Squamous cell carcinoma                | before, during |
| P18        | 41  | M   | Adenoid cystic carcinoma               | none           |
| P24        | 41  | F   | Sinonasal undifferentiated carcinoma   | before, during |
| P41        | 50  | M   | Acinar cell carcinoma parotid gland    | none           |
| P44        | 59  | M   | Squamous cell carcinoma                | before, during |
| P50        | 79  | F   | Squamous cell carcinoma                | None           |
| P55        | 53  | M   | Squamous cell carcinoma                | before, during |
| P56        | 49  | M   | Acinar cell carcinoma parotid gland    | none           |
| P63        | 81  | M   | Acinar cell carcinoma parotid gland    | none           |
| P72        | 63  | F   | Adenoid cystic carcinoma parotid gland | during         |
